# Supplementary material for: Multi-coloration of polyurethane derivatives through click postfunctionalization, electrochemical oxidation, and Ag+ ion complexation
Source: Royal Society of Chemistry journal article supplement (doi:10.1039/c2jm30298e), 2012-01-01
Supplement: c2jm30298e.pdf [file c2jm30298e.pdf]

**Multi-coloration of polyurethane derivatives through click postfunctionalization,  
electrochemical oxidation, and Ag<sup>+</sup> ion complexation**

Yongrong Li<sup>a</sup> and Tsuyoshi Michinobu<sup>\*,b,c</sup>

<sup>a</sup>*Department of Organic and Polymeric Materials, Tokyo Institute of Technology, 2-12-1 Ookayama, Meguro-ku, Tokyo 152-8552, Japan*

<sup>b</sup>*Global Edge Institute, Tokyo Institute of Technology, 2-12-1 Ookayama, Meguro-ku, Tokyo 152-8550, Japan*

<sup>c</sup>*Precursory Research for Embryonic Science and Technology (PRESTO), Japan Science and Technology Agency (JST), Honcho 4-1-8, Kawaguchi-shi, Saitama 332-0012, Japan*

\*Correspondence Address:

Dr. Tsuyoshi Michinobu

Global Edge Institute, Tokyo Institute of Technology

2-12-1 Ookayama, Meguro-ku, Tokyo 152-8550, Japan

Tel/Fax: +81-3-5734-3774, E-mail: michinobu.t.aa@m.titech.ac.jp

## 1. $^1\text{H}$ NMR spectra

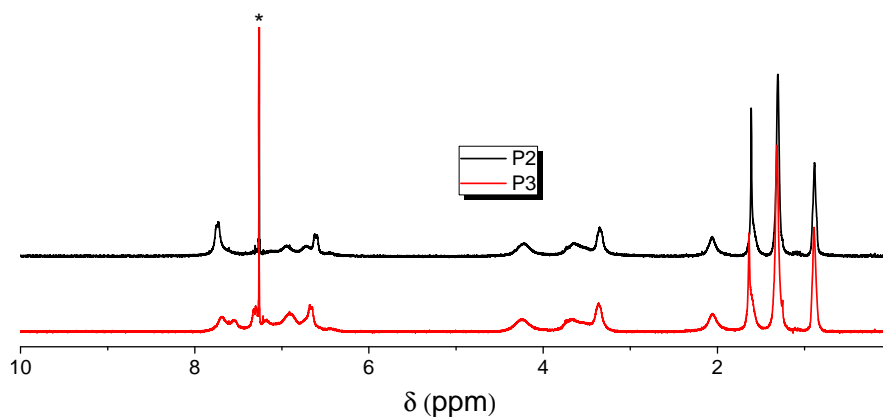

**Fig. S1**  $^1\text{H}$  NMR spectra of **P2** and **P3** in  $\text{CDCl}_3$  at 20 °C.

## 2. Thermogravimetric analysis (TGA)

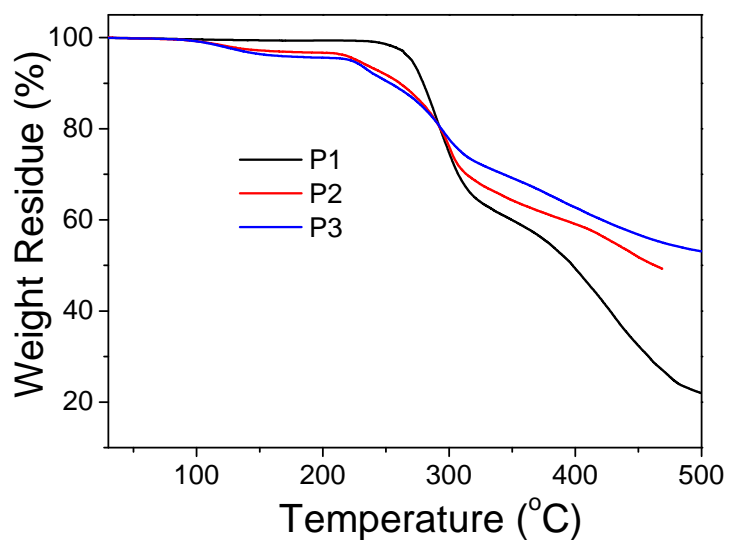

**Fig. S2** Thermogravimetric analysis of **P1-P3** at the heating rate of  $10\text{ °C min}^{-1}$  under flowing nitrogen.

### 3. Electrochemical oxidation

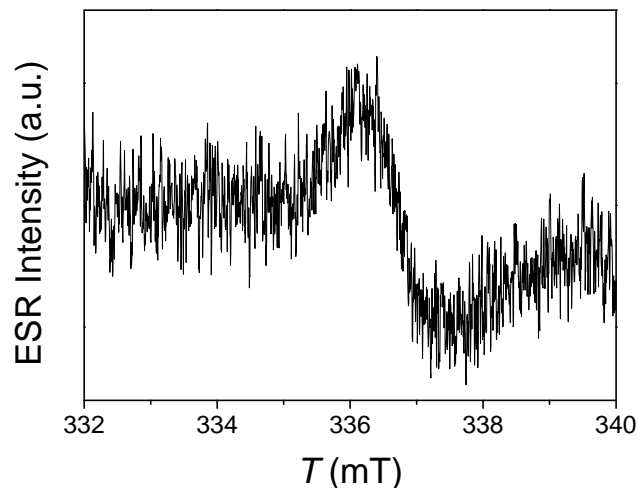

**Fig. S3** ESR spectrum of the **P1** thin film on an ITO-coated glass plate by applying 0.25 V for 300 s. The spectrum was recorded one day after the oxidation. The ITO-coated glass plate did not show any ESR signals under the same conditions.

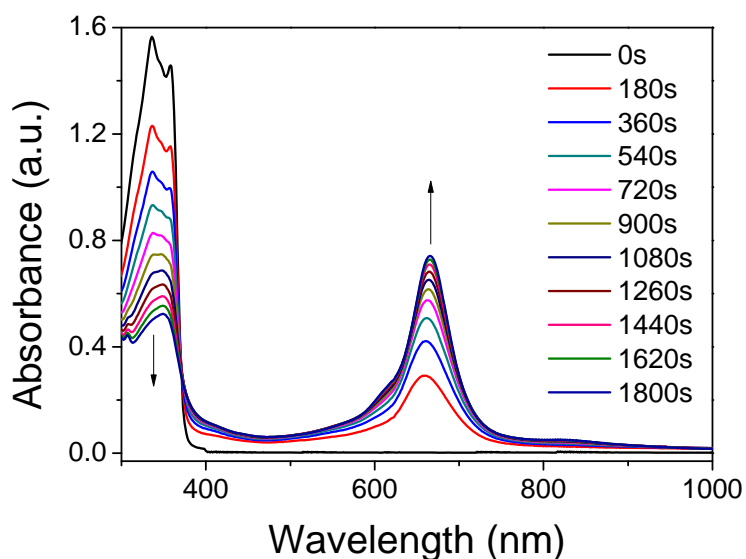

**Fig. S4** UV-vis-near IR spectral change of **P1** solution in  $\text{CHCl}_3$  containing 0.1 M  $(n\text{C}_4\text{H}_9)_4\text{NClO}_4$  by applying a controlled potential of 0.25 V at 20 °C. Platinum mesh was used as a working electrode.

#### 4. Colorimetry

**Table S1** Summary of  $L^*a^*b^*$  values for the polyurethane derivatives in  $\text{CHCl}_3$  (300  $\mu\text{M}$  repeat unit<sup>-1</sup>)

|       | <b>P1</b> | <b>P2</b> | <b>P3</b> | <b>P2+Ag<sup>+</sup></b> | <b>P3+Ag<sup>+</sup></b> | <b>P1<sup>+</sup></b> |
|-------|-----------|-----------|-----------|--------------------------|--------------------------|-----------------------|
| $L^*$ | 100       | 82.65     | 71.37     | 63.55                    | 71.55                    | 89.68                 |
| $a^*$ | 0         | 23.13     | -23.48    | 58.16                    | -7.86                    | -14.48                |
| $b^*$ | 0         | 76.52     | 31.72     | 13.54                    | 50.51                    | -7.14                 |

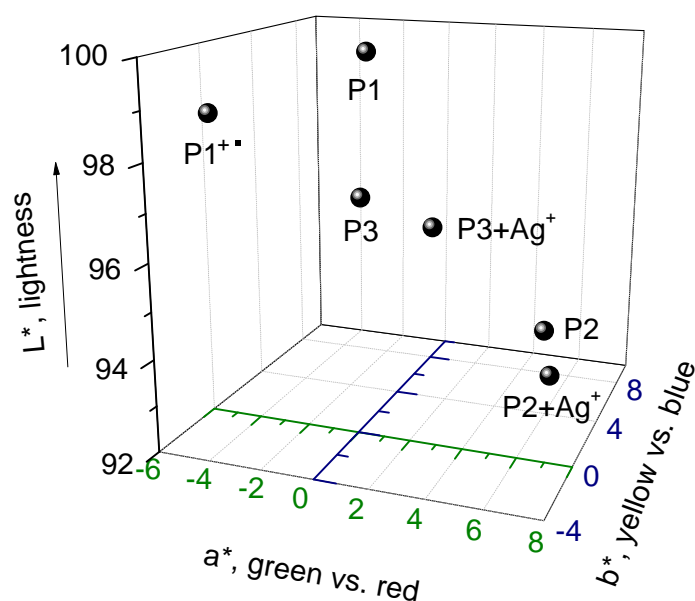

**Fig. S5** Three-dimensional  $L^*a^*b^*$  plots of values for the polyurethane thin films with the thickness of about 1  $\mu\text{m}$ : **P1**, **P2**, **P3**, **P2** complex with  $\text{Ag}^+$  ions (**P2+Ag<sup>+</sup>**), **P3** complex with  $\text{Ag}^+$  ions (**P3+Ag<sup>+</sup>**), and electrochemically-oxidized state of **P1** by 0.25 V application for 0.5 h (**P1<sup>+</sup>**).

**Table S2** Summary of  $L^*a^*b^*$  values for the polyurethane thin films<sup>a</sup>

|    | <b>P1</b> | <b>P2</b> | <b>P3</b> | <b>P2+Ag<sup>+</sup></b> | <b>P3+Ag<sup>+</sup></b> | <b>P1<sup>+</sup></b> |
|----|-----------|-----------|-----------|--------------------------|--------------------------|-----------------------|
| L* | 99.86     | 94.12     | 95.85     | 93.56                    | 95.27                    | 99.88                 |
| a* | -0.36     | 6.11      | -3.19     | 6.79                     | 0.01                     | -4.31                 |
| b* | 1.81      | 3.05      | 7.98      | 1.27                     | 8.10                     | -2.54                 |

<sup>a</sup> Film thickness of about 1  $\mu\text{m}$ .
